# Supplementary material for: Different methods of fear reduction are supported by distinct cortical substrates
Source: eLife. 2020 Jun 26;9:e55294. doi: 10.7554/eLife.55294 (PMC7343386; doi:10.7554/eLife.55294)
Supplement: Figure 1—source data 1. [file elife-55294-fig1-data1.xlsx]

## Sheet: Sheet1
Phase 1: Conditioning											Phase 2: Overexpectation Training									Test for Overexpectation																						Test for Overexpectation: 5 min acclimation period
Tone+
		CS (Day 1, 3, 5)				CS (Day 1, 3, 5; %)							CS (trial)			CS (trial; %)						CS (trial)									CS (trial; %)													Time (min)
Rat	Group	1	2	3		1	2	3			Rat	Group	1	2		1	2			Rat	Group	1	2	3	4	5	6	7	8		1	2	3	4	5	6	7	8				Rat	Group	1	2	3	4	5
2	OE-D	0	5	1		0	33.3333	6.66667			2	OE-D	12	13		80	86.6667			2	OE-D	3	5	5	6	0	4	3	3		20	33.3333	33.3333	40	0	26.6667	20	20				2	OE-D	1	0	2	8	7
4	OE-D	0	4	0		0	26.6667	0			4	OE-D	7	14		46.6667	93.3333			4	OE-D	11	11	10	10	6	2	5	5		73.3333	73.3333	66.6667	66.6667	40	13.3333	33.3333	33.3333				4	OE-D	2	7	17	15	7
11	OE-D	0	4	7		0	26.6667	46.6667			11	OE-D	4	12		26.6667	80			11	OE-D	6	0	5	0	0	0	3	3		40	0	33.3333	0	0	0	20	20				11	OE-D	0	1	0	0	4
18	OE-D	0	2	2		0	13.3333	13.3333			18	OE-D	13	13		86.6667	86.6667			18	OE-D	1	2	10	5	6	5	3	4		6.66667	13.3333	66.6667	33.3333	40	33.3333	20	26.6667				18	OE-D	0	3	4	2	1
23	OE-D	0	0	3		0	0	20			23	OE-D	6	13		40	86.6667			23	OE-D	5	4	2	2	1	0	0	0		33.3333	26.6667	13.3333	13.3333	6.66667	0	0	0				23	OE-D	0	0	0	1	8
26	OE-D	0	4	11		0	26.6667	73.3333			26	OE-D	15	15		100	100			26	OE-D	5	8	1	3	0	1	0	0		33.3333	53.3333	6.66667	20	0	6.66667	0	0				26	OE-D	15	17	14	20	17
1	OE-D	0	6	0		0	40	0			1	OE-D	11	11		73.3333	73.3333			1	OE-D	3	3	0	0	0	0	3	2		20	20	0	0	0	0	20	13.3333				1	OE-D	3	1	3	0	7
7	OE-D	0	10	14		0	66.6667	93.3333			7	OE-D	12	13		80	86.6667			7	OE-D	1	1	0	7	8	10	5	4		6.66667	6.66667	0	46.6667	53.3333	66.6667	33.3333	26.6667				7	OE-D	0	2	2	2	4
13	OE-D	0	2	8		0	13.3333	53.3333			13	OE-D	7	8		46.6667	53.3333			13	OE-D	8	10	11	8	11	7	2	4		53.3333	66.6667	73.3333	53.3333	73.3333	46.6667	13.3333	26.6667				13	OE-D	0	1	0	2	2
17	OE-D	0	0	0		0	0	0			17	OE-D	13	14		86.6667	93.3333			17	OE-D	3	2	1	1	1	1	0	0		20	13.3333	6.66667	6.66667	6.66667	6.66667	0	0				17	OE-D	2	1	2	5	3
22	OE-D	0	2	4		0	13.3333	26.6667			22	OE-D	8	12		53.3333	80			22	OE-D	2	6	3	8	5	5	3	0		13.3333	40	20	53.3333	33.3333	33.3333	20	0				22	OE-D	4	14	11	13	14
25	OE-D	0	5	1		0	33.3333	6.66667			25	OE-D	12	4		80	26.6667			25	OE-D	0	0	0	0	0	0	0	0		0	0	0	0	0	0	0	0				25	OE-D	12	9	15	16	8
27	OE-D	0	3	2		0	20	13.3333			27	OE-D	7	13		46.6667	86.6667			27	OE-D	7	6	3	6	9	3	1	4		46.6667	40	20	40	60	20	6.66667	26.6667				27	OE-D	0	8	10	15	17
3	OE-V	0	0	2		0	0	13.3333			3	OE-V	13	15		86.6667	100			3	OE-V	6	5	4	4	5	1	3	1		40	33.3333	26.6667	26.6667	33.3333	6.66667	20	6.66667				3	OE-V	8	9	22	19	11
6	OE-V	0	0	9		0	0	60			6	OE-V	12	13		80	86.6667			6	OE-V	8	10	8	3	6	3	3	2		53.3333	66.6667	53.3333	20	40	20	20	13.3333				6	OE-V	0	0	0	2	0
22	OE-V	0	1	4		0	6.66667	26.6667			22	OE-V	14	14		93.3333	93.3333			22	OE-V	3	2	1	3	4	4	5	3		20	13.3333	6.66667	20	26.6667	26.6667	33.3333	20				22	OE-V	9	2	6	8	21
24	OE-V	0	8	5		0	53.3333	33.3333			24	OE-V	9	12		60	80			24	OE-V	9	11	10	7	10	8	4	3		60	73.3333	66.6667	46.6667	66.6667	53.3333	26.6667	20				24	OE-V	0	1	0	1	0
25	OE-V	0	0	3		0	0	20			25	OE-V	7	15		46.6667	100			25	OE-V	2	1	0	3	5	1	0	1		13.3333	6.66667	0	20	33.3333	6.66667	0	6.66667				25	OE-V	4	0	0	5	1
30	OE-V	0	12	5		0	80	33.3333			30	OE-V	13	14		86.6667	93.3333			30	OE-V	3	7	6	9	9	2	4	2		20	46.6667	40	60	60	13.3333	26.6667	13.3333				30	OE-V	0	0	7	9	4
6	OE-V	0	4	7		0	26.6667	46.6667			6	OE-V	11	14		73.3333	93.3333			6	OE-V	2	6	9	10	7	5	0	2		13.3333	40	60	66.6667	46.6667	33.3333	0	13.3333				6	OE-V	0	2	0	15	15
8	OE-V	0	1	1		0	6.66667	6.66667			8	OE-V	4	8		26.6667	53.3333			8	OE-V	4	6	1	5	0	2	0	0		26.6667	40	6.66667	33.3333	0	13.3333	0	0				8	OE-V	0	2	2	0	0
11	OE-V	0	3	0		0	20	0			11	OE-V	8	12		53.3333	80			11	OE-V	3	10	12	10	7	5	0	1		20	66.6667	80	66.6667	46.6667	33.3333	0	6.66667				11	OE-V	1	5	14	19	10
29	OE-V	0	4	2		0	26.6667	13.3333			29	OE-V	3	13		20	86.6667			29	OE-V	10	6	10	12	8	5	0	0		66.6667	40	66.6667	80	53.3333	33.3333	0	0				29	OE-V	0	1	10	8	4
31	OE-V	0	0	1		0	0	6.66667			31	OE-V	1	10		6.66667	66.6667			31	OE-V	0	0	1	2	3	0	0	0		0	0	6.66667	13.3333	20	0	0	0				31	OE-V	0	3	12	13	11
1	CON-D	0	0	4		0	0	26.6667												1	CON-D	2	1	1	2	0	0	0	1		13.3333	6.66667	6.66667	13.3333	0	0	0	6.66667				1	CON-D	0	0	1	1	0
14	CON-D	0	1	7		0	6.66667	46.6667							OE-D	65.1282	79.4872			14	CON-D	10	13	15	14	12	9	0	7		66.6667	86.6667	100	93.3333	80	60	0	46.6667				14	CON-D	0	0	1	7	1
16	CON-D	0	6	0		0	40	0							OE-V	57.5758	84.8485			16	CON-D	8	9	9	10	10	4	8	1		53.3333	60	60	66.6667	66.6667	26.6667	53.3333	6.66667				16	CON-D	1	2	4	7	9
20	CON-D	0	5	11		0	33.3333	73.3333												20	CON-D	11	15	15	12	12	6	3	2		73.3333	100	100	80	80	40	20	13.3333				20	CON-D	4	5	7	9	12
29	CON-D	0	2	3		0	13.3333	20												29	CON-D	6	10	9	6	9	14	8	5		40	66.6667	60	40	60	93.3333	53.3333	33.3333				29	CON-D	0	0	0	0	1
3	CON-D	0	1	5		0	6.66667	33.3333												3	CON-D	6	6	9	10	8	1	6	1		40	40	60	66.6667	53.3333	6.66667	40	6.66667				3	CON-D	2	7	3	0	0
5	CON-D	0	2	5		0	13.3333	33.3333												5	CON-D	12	12	13	7	10	8	10	8		80	80	86.6667	46.6667	66.6667	53.3333	66.6667	53.3333				5	CON-D	0	0	0	3	8
12	CON-D	0	0	0		0	0	0												12	CON-D	12	1	8	3	1	1	1	8		80	6.66667	53.3333	20	6.66667	6.66667	6.66667	53.3333				12	CON-D	1	3	1	9	9
21	CON-D	0	3	11		0	20	73.3333												21	CON-D	12	13	14	13	13	11	9	9		80	86.6667	93.3333	86.6667	86.6667	73.3333	60	60				21	CON-D	3	3	18	11	12
23	CON-D	0	2	7		0	13.3333	46.6667												23	CON-D	2	5	9	11	11	10	7	8		13.3333	33.3333	60	73.3333	73.3333	66.6667	46.6667	53.3333				23	CON-D	0	0	0	0	0
28	CON-D	0	0	1		0	0	6.66667												28	CON-D	3	3	7	7	5	5	3	2		20	20	46.6667	46.6667	33.3333	33.3333	20	13.3333				28	CON-D	1	4	3	7	7
5	CON-V	0	2	7		0	13.3333	46.6667												5	CON-V	5	3	2	7	5	7	8	1		33.3333	20	13.3333	46.6667	33.3333	46.6667	53.3333	6.66667				5	CON-V	0	0	0	0	0
12	CON-V	1	0	6		6.66667	0	40												12	CON-V	10	8	5	5	5	5	6	3		66.6667	53.3333	33.3333	33.3333	33.3333	33.3333	40	20				12	CON-V	0	0	0	0	1
13	CON-V	0	3	2		0	20	13.3333												13	CON-V	14	14	15	8	5	5	1	3		93.3333	93.3333	100	53.3333	33.3333	33.3333	6.66667	20				13	CON-V	0	0	0	0	0
15	CON-V	0	0	6		0	0	40												15	CON-V	1	6	10	11	11	4	1	5		6.66667	40	66.6667	73.3333	73.3333	26.6667	6.66667	33.3333				15	CON-V	0	0	0	0	0
19	CON-V	0	0	4		0	0	26.6667												19	CON-V	11	10	13	13	11	9	13	11		73.3333	66.6667	86.6667	86.6667	73.3333	60	86.6667	73.3333				19	CON-V	0	0	2	3	7
21	CON-V	0	2	0		0	13.3333	0												21	CON-V	6	7	12	8	2	11	2	4		40	46.6667	80	53.3333	13.3333	73.3333	13.3333	26.6667				21	CON-V	0	1	9	10	14
31	CON-V	0	7	11		0	46.6667	73.3333												31	CON-V	15	15	14	14	14	15	15	6		100	100	93.3333	93.3333	93.3333	100	100	40				31	CON-V	0	5	7	12	8
32	CON-V	0	5	3		0	33.3333	20												32	CON-V	10	13	12	12	13	11	9	6		66.6667	86.6667	80	80	86.6667	73.3333	60	40				32	CON-V	0	2	3	0	5
2	CON-V	0	10	6		0	66.6667	40												2	CON-V	7	9	7	5	8	8	7	7		46.6667	60	46.6667	33.3333	53.3333	53.3333	46.6667	46.6667				2	CON-V	0	0	1	4	12
4	CON-V	0	0	0		0	0	0												4	CON-V	5	7	3	2	1	6	0	5		33.3333	46.6667	20	13.3333	6.66667	40	0	33.3333				4	CON-V	0	0	0	3	5
9	CON-V	0	0	7		0	0	46.6667												9	CON-V	5	3	3	3	1	0	0	0		33.3333	20	20	20	6.66667	0	0	0				9	CON-V	20	27	27	27	22
14	CON-V	0	4	8		0	26.6667	53.3333												14	CON-V	12	11	9	10	8	9	5	6		80	73.3333	60	66.6667	53.3333	60	33.3333	40				14	CON-V	0	0	0	3	1
19	CON-V	0	9	5		0	60	33.3333												19	CON-V	8	14	12	12	9	6	5	2		53.3333	93.3333	80	80	60	40	33.3333	13.3333				19	CON-V	1	1	6	15	11
32	CON-V	2	4	7		13.3333	26.6667	46.6667												32	CON-V	6	12	8	9	7	5	4	1		40	80	53.3333	60	46.6667	33.3333	26.6667	6.66667				32	CON-V	0	1	7	1	4
					OE-D	0	24.1026	27.1795																						OE-D	28.2051	29.7436	26.1538	28.7179	24.1026	19.4872	14.359	14.8718
					OE-V	0	20	23.6364																						OE-V	30.303	38.7879	37.5758	41.2121	38.7879	21.8182	11.5152	9.09091
					CON-D	0	13.3333	32.7273																						CON-D	50.9091	53.3333	66.0606	57.5758	55.1515	41.8182	33.3333	31.5152
					CON-V	1.42857	21.9048	34.2857																						CON-V	54.7619	62.8571	59.5238	56.6667	47.619	48.0952	36.1905	28.5714
Flash+
		CS (Day 2,4,6)				CS (Day 2,4,6; %)
Rat	Group	1	2	3		1	2	3
2	OE-D	1	12	13		6.66667	80	86.6667
4	OE-D	0	4	4		0	26.6667	26.6667
11	OE-D	0	5	4		0	33.3333	26.6667
18	OE-D	0	5	12		0	33.3333	80
23	OE-D	0	7	6		0	46.6667	40
26	OE-D	0	13	9		0	86.6667	60
1	OE-D	0	7	8		0	46.6667	53.3333
7	OE-D	0	1	9		0	6.66667	60
13	OE-D	0	1	0		0	6.66667	0
17	OE-D	0	13	7		0	86.6667	46.6667
22	OE-D	0	2	6		0	13.3333	40
25	OE-D	0	1	8		0	6.66667	53.3333
27	OE-D	0	3	12		0	20	80
3	OE-V	0	0	14		0	0	93.3333
6	OE-V	0	7	6		0	46.6667	40
22	OE-V	0	4	5		0	26.6667	33.3333
24	OE-V	1	13	7		6.66667	86.6667	46.6667
25	OE-V	0	9	10		0	60	66.6667
30	OE-V	0	12	6		0	80	40
6	OE-V	0	7	5		0	46.6667	33.3333
8	OE-V	0	1	2		0	6.66667	13.3333
11	OE-V	0	5	12		0	33.3333	80
29	OE-V	0	3	4		0	20	26.6667
31	OE-V	0	0	3		0	0	20
1	CON-D	0	5	5		0	33.3333	33.3333
14	CON-D	0	5	11		0	33.3333	73.3333
16	CON-D	0	4	4		0	26.6667	26.6667
20	CON-D	0	4	9		0	26.6667	60
29	CON-D	0	5	7		0	33.3333	46.6667
3	CON-D	0	7	11		0	46.6667	73.3333
5	CON-D	0	8	9		0	53.3333	60
12	CON-D	0	13	0		0	86.6667	0
21	CON-D	0	5	11		0	33.3333	73.3333
23	CON-D	0	2	13		0	13.3333	86.6667
28	CON-D	0	1	5		0	6.66667	33.3333
5	CON-V	0	0	3		0	0	20
12	CON-V	0	2	6		0	13.3333	40
13	CON-V	0	6	6		0	40	40
15	CON-V	0	0	11		0	0	73.3333
19	CON-V	0	4	9		0	26.6667	60
21	CON-V	0	0	5		0	0	33.3333
31	CON-V	0	1	10		0	6.66667	66.6667
32	CON-V	0	5	11		0	33.3333	73.3333
2	CON-V	0	11	4		0	73.3333	26.6667
4	CON-V	0	0	5		0	0	33.3333
9	CON-V	0	14	15		0	93.3333	100
14	CON-V	0	0	4		0	0	26.6667
19	CON-V	0	13	14		0	86.6667	93.3333
32	CON-V	0	1	0		0	6.66667	0
					OE-D	0.512821	37.9487	50.2564
					OE-V	0.606061	36.9697	44.8485
					CON-D	0	35.7576	51.5152
					CON-V	0	27.1429	49.0476
[truncated: 5 more columns]
