# Supplementary material for: Different methods of fear reduction are supported by distinct cortical substrates
Source: eLife. 2020 Jun 26;9:e55294. doi: 10.7554/eLife.55294 (PMC7343386; doi:10.7554/eLife.55294)
Supplement: Figure 2—source data 1. [file elife-55294-fig2-data1.xlsx]

## Sheet: Sheet1
Phase 3: Conditioning												Phase 4: Extinction																												Test for Extinction
		CS (trial)					CS (trial; %)							CS (trial)													CS (trial; %)															CS (trial)
Rat	Group	1	2	3	4		1	2	3	4		Rat	Group	1	2	3	4	5	6	7	8	9	10	11	12		1	2	3	4	5	6	7	8	9	10	11	12		Rat	Group	1	2	3	4	5	6	7	8
18	EXT Drug	0	3	5	3		0	20	33.3333	20		2	EXT-D	6	6	6	6	11	3	5	3	5	6	5	7		40	40	40	40	73.3333	20	33.3333	20	33.3333	40	33.3333	46.6667		2	EXT-D	7	0	5	4	7	6	4	1
20	EXT Drug	1	12	11	12		6.66667	80	73.3333	80		6	EXT-D	2	4	4	3	7	4	7	4	2	7	7	6		13.3333	26.6667	26.6667	20	46.6667	26.6667	46.6667	26.6667	13.3333	46.6667	46.6667	40		6	EXT-D	6	9	10	11	3	6	4	4
22	EXT Drug	0	3	10	8		0	20	66.6667	53.3333		7	EXT-D	11	11	5	6	6	8	6	1	0	4	2	5		73.3333	73.3333	33.3333	40	40	53.3333	40	6.66667	0	26.6667	13.3333	33.3333		7	EXT-D	3	0	1	1	0	1	0	0
26	EXT Drug	2	2	13	9		13.3333	13.3333	86.6667	60		11	EXT-D	8	10	11	8	7	3	6	3	1	3	1	1		53.3333	66.6667	73.3333	53.3333	46.6667	20	40	20	6.66667	20	6.66667	6.66667		11	EXT-D	11	10	5	5	4	3	5	4
2	EXT-D	4	6	9	8		26.6667	40	60	53.3333		20	EXT-D	14	12	12	9	13	10	12	8	13	8	3	6		93.3333	80	80	60	86.6667	66.6667	80	53.3333	86.6667	53.3333	20	40		20	EXT-D	12	8	11	7	6	4	1	2
6	EXT-D	1	3	4	8		6.66667	20	26.6667	53.3333		22	EXT-D	9	8	1	0	6	5	2	4	5	1	3	1		60	53.3333	6.66667	0	40	33.3333	13.3333	26.6667	33.3333	6.66667	20	6.66667		22	EXT-D	3	0	0	2	2	2	3	4
7	EXT-D	3	4	3	3		20	26.6667	20	20		26	EXT-D	7	10	7	3	3	0	0	0	0	0	0	2		46.6667	66.6667	46.6667	20	20	0	0	0	0	0	0	13.3333		26	EXT-D	12	8	2	1	3	3	2	3
11	EXT-D	0	7	7	7		0	46.6667	46.6667	46.6667		18	EXT-D	12	14	11	6	5	5	7	5	5	3	3	7		80	93.3333	73.3333	40	33.3333	33.3333	46.6667	33.3333	33.3333	20	20	46.6667		18	EXT-D	9	6	3	1	2	1	0	1
13	EXT-D	0	11	8	10		0	73.3333	53.3333	66.6667		13	EXT-D	6	1	4	5	0	5	1	2	0	0	11	11		40	6.66667	26.6667	33.3333	0	33.3333	6.66667	13.3333	0	0	73.3333	73.3333		13	EXT-D	6	7	0	2	0	3	1	0
14	EXT-D	2	8	10	11		13.3333	53.3333	66.6667	73.3333		14	EXT-D	3	3	3	0	0	5	4	4	1	2	2	5		20	20	20	0	0	33.3333	26.6667	26.6667	6.66667	13.3333	13.3333	33.3333		14	EXT-D	6	4	3	5	9	5	0	3
32	EXT-D	7	2	5	3		46.6667	13.3333	33.3333	20		32	EXT-D	1	6	5	0	7	1	5	3	3	0	1	5		6.66667	40	33.3333	0	46.6667	6.66667	33.3333	20	20	0	6.66667	33.3333		32	EXT-D	6	10	4	6	6	6	2	6
19	EXT-V	0	3	6	8		0	20	40	53.3333		21	EXT-V	1	4	1	0	0	2	2	1	4	0	0	2		6.66667	26.6667	6.66667	0	0	13.3333	13.3333	6.66667	26.6667	0	0	13.3333		21	EXT-V	3	7	1	2	2	0	2	0
21	EXT-V	1	4	5	3		6.66667	26.6667	33.3333	20		31	EXT-V	11	7	2	2	3	1	5	5	1	0	0	6		73.3333	46.6667	13.3333	13.3333	20	6.66667	33.3333	33.3333	6.66667	0	0	40		31	EXT-V	8	7	0	6	0	1	6	2
23	EXT-V	0	6	9	6		0	40	60	40		19	EXT-V	4	6	3	3	4	0	1	2	0	1	0	0		26.6667	40	20	20	26.6667	0	6.66667	13.3333	0	6.66667	0	0		19	EXT-V	2	0	1	0	2	1	0	1
24	EXT-V	0	6	9	5		0	40	60	33.3333		23	EXT-V	1	1	2	0	0	2	0	1	0	1	0	4		6.66667	6.66667	13.3333	0	0	13.3333	0	6.66667	0	6.66667	0	26.6667		23	EXT-V	2	1	0	0	0	0	0	0
25	EXT-V	0	2	6	14		0	13.3333	40	93.3333		24	EXT-V	2	2	1	0	0	0	0	1	0	0	0	3		13.3333	13.3333	6.66667	0	0	0	0	6.66667	0	0	0	20		24	EXT-V	4	2	1	0	0	0	2	0
29	EXT-V	0	8	11	7		0	53.3333	73.3333	46.6667		25	EXT-V	0	0	0	0	0	0	0	0	0	0	2	1		0	0	0	0	0	0	0	0	0	0	13.3333	6.66667		25	EXT-V	3	0	0	0	0	0	0	0
30	EXT-V	0	14	14	9		0	93.3333	93.3333	60		29	EXT-V	5	7	1	0	1	0	0	0	1	0	2	1		33.3333	46.6667	6.66667	0	6.66667	0	0	0	6.66667	0	13.3333	6.66667		29	EXT-V	0	2	1	0	0	1	0	3
31	EXT-V	0	11	11	9		0	73.3333	73.3333	60		30	EXT-V	14	11	4	6	2	4	4	0	0	3	0	0		93.3333	73.3333	26.6667	40	13.3333	26.6667	26.6667	0	0	20	0	0		30	EXT-V	12	3	2	0	0	1	0	0
32	EXT-V	0	10	10	6		0	66.6667	66.6667	40		32	EXT-V	2	2	2	0	0	0	0	1	0	2	1	1		13.3333	13.3333	13.3333	0	0	0	0	6.66667	0	13.3333	6.66667	6.66667		32	EXT-V	0	0	0	0	0	0	1	0
22	EXT-V	4	9	11	10		26.6667	60	73.3333	66.6667		22	EXT-V	5	3	4	4	7	9	6	3	6	4	8	5		33.3333	20	26.6667	26.6667	46.6667	60	40	20	40	26.6667	53.3333	33.3333		22	EXT-V	0	3	1	3	6	6	4	4
27	EXT-V	1	0	2	0		6.66667	0	13.3333	0		27	EXT-V	0	4	0	0	0	7	2	0	0	0	2	1		0	26.6667	0	0	0	46.6667	13.3333	0	0	0	13.3333	6.66667		27	EXT-V	0	0	0	0	0	0	0	0
1	CON-D	0	3	2	0		0	20	13.3333	0																														1	CON-D	8	4	2	1	2	1	0	0
3	CON-D	0	7	6	5		0	46.6667	40	33.3333																EXT-D	47.8788	51.5152	41.8182	27.8788	39.3939	29.697	33.3333	22.4242	21.2121	20.6061	23.0303	33.9394		3	CON-D	9	9	0	0	0	1	0	0
9	CON-D	0	5	4	4		0	33.3333	26.6667	26.6667																EXT-V	27.2727	28.4848	12.1212	9.09091	10.303	15.1515	12.1212	8.48485	7.27273	6.66667	9.09091	14.5455		9	CON-D	12	3	2	1	2	2	0	0
12	CON-D	0	10	14	13		0	66.6667	93.3333	86.6667																														12	CON-D	8	6	8	8	5	3	8	5
17	CON-D	1	2	12	2		6.66667	13.3333	80	13.3333																														17	CON-D	4	4	11	6	2	4	0	0
23	CON-D	2	8	13	12		13.3333	53.3333	86.6667	80																														23	CON-D	7	11	2	5	5	5	4	1
28	CON-D	6	9	7	7		40	60	46.6667	46.6667																														28	CON-D	12	7	3	8	7	7	5	5
31	CON-D	0	5	0	3		0	33.3333	0	20																														31	CON-D	2	3	2	1	1	2	5	1
4	CON-V	0	0	1	5		0	0	6.66667	33.3333																														4	CON-V	4	6	4	3	1	5	0	1
5	CON-V	0	10	12	7		0	66.6667	80	46.6667																														5	CON-V	2	4	5	3	5	1	3	5
8	CON-V	0	2	6	4		0	13.3333	40	26.6667																														8	CON-V	1	2	1	0	1	0	1	0
19	CON-V	8	12	13	7		53.3333	80	86.6667	46.6667																														19	CON-V	9	14	2	5	10	10	3	3
21	CON-V	8	5	14	14		53.3333	33.3333	93.3333	93.3333																														21	CON-V	13	12	13	8	4	4	3	4
25	CON-V	4	0	5	0		26.6667	0	33.3333	0																														25	CON-V	1	0	0	1	2	1	2	5
29	CON-V	8	1	5	2		53.3333	6.66667	33.3333	13.3333																														29	CON-V	2	7	3	0	1	2	0	1
						EXT-D	12.1212	36.9697	51.5152	49.697
						EXT-V	3.63636	44.2424	56.9697	46.6667
						CON-D	7.5	40.8333	48.3333	38.3333
						CON-V	26.6667	28.5714	53.3333	37.1429
[truncated: 28 more columns]
