# Supplementary material for: Different methods of fear reduction are supported by distinct cortical substrates
Source: eLife. 2020 Jun 26;9:e55294. doi: 10.7554/eLife.55294 (PMC7343386; doi:10.7554/eLife.55294)
Supplement: Figure 3—source data 1. [file elife-55294-fig3-data1.xlsx]

## Sheet: Sheet1
Phase 1: Conditioning																						Phase 2: Overexpectation Training									Test for Overexpectation
											Data excluding outlier
Tone+
		CS (Day 1, 3, 5)				CS (Day 1, 3, 5; %)							CS (Day 1, 3, 5)				CS (Day 1, 3, 5; %)							CS (trial)			CS (trial; %)						CS (trial)									CS (trial; %)
Rat	Group	1	2	3		1	2	3			Rat	Group	1	2	3		1	2	3			Rat	Group	1	2		1	2			Rat	Group	1	2	3	4	5	6	7	8		1	2	3	4	5	6	7	8
3	OE-D	0	4	9		0	26.6667	60			3	OE-D	0	4	9		0	26.6667	60			3	OE-D	15	12		100	80			3	OE-D	6	11	8	12	1	3	2	2		40	73.3333	53.3333	80	6.66667	20	13.3333	13.3333
5	OE-D	0	6	9		0	40	60			5	OE-D	0	6	9		0	40	60			5	OE-D	9	14		60	93.3333			5	OE-D	6	6	6	6	4	1	2	4		40	40	40	40	26.6667	6.66667	13.3333	26.6667
7	OE-D	0	8	5		0	53.3333	33.3333			7	OE-D	0	8	5		0	53.3333	33.3333			7	OE-D	14	12		93.3333	80			7	OE-D	12	15	12	13	13	11	4	9		80	100	80	86.6667	86.6667	73.3333	26.6667	60
11	OE-D	0	11	11		0	73.3333	73.3333			11	OE-D	0	11	11		0	73.3333	73.3333			11	OE-D	15	12		100	80			11	OE-D	9	13	7	14	13	12	12	14		60	86.6667	46.6667	93.3333	86.6667	80	80	93.3333
14	OE-D	0	7	4		0	46.6667	26.6667			14	OE-D	0	7	4		0	46.6667	26.6667			14	OE-D	13	15		86.6667	100			14	OE-D	11	10	9	7	4	3	0	4		73.3333	66.6667	60	46.6667	26.6667	20	0	26.6667
19	OE-D	0	9	10		0	60	66.6667			19	OE-D	0	9	10		0	60	66.6667			19	OE-D	14	15		93.3333	100			19	OE-D	14	15	12	11	13	7	4	3		93.3333	100	80	73.3333	86.6667	46.6667	26.6667	20
25	OE-D	0	10	2		0	66.6667	13.3333			25	OE-D	0	10	2		0	66.6667	13.3333			25	OE-D	15	15		100	100			25	OE-D	13	14	15	15	14	13	12	8		86.6667	93.3333	100	100	93.3333	86.6667	80	53.3333
31	OE-D	0	9	7		0	60	46.6667			31	OE-D	0	9	7		0	60	46.6667			31	OE-D	13	8		86.6667	53.3333			31	OE-D	13	13	11	11	6	10	4	1		86.6667	86.6667	73.3333	73.3333	40	66.6667	26.6667	6.66667
34	OE-D	0	5	10		0	33.3333	66.6667			34	OE-D	0	5	10		0	33.3333	66.6667			34	OE-D	14	15		93.3333	100			34	OE-D	12	12	14	13	9	9	6	5		80	80	93.3333	86.6667	60	60	40	33.3333
38	OE-D	0	8	11		0	53.3333	73.3333			38	OE-D	0	8	11		0	53.3333	73.3333			38	OE-D	14	15		93.3333	100			38	OE-D	15	15	12	8	11	2	2	0		100	100	80	53.3333	73.3333	13.3333	13.3333	0
39	OE-D	0	10	9		0	66.6667	60			39	OE-D	0	10	9		0	66.6667	60			39	OE-D	13	14		86.6667	93.3333			39	OE-D	13	13	14	14	5	8	7	8		86.6667	86.6667	93.3333	93.3333	33.3333	53.3333	46.6667	53.3333
47	OE-D	0	10	8		0	66.6667	53.3333			47	OE-D	0	10	8		0	66.6667	53.3333			47	OE-D	15	15		100	100			47	OE-D	9	14	14	15	15	8	2	8		60	93.3333	93.3333	100	100	53.3333	13.3333	53.3333
1	OE-V	0	8	11		0	53.3333	73.3333			1	OE-V	0	8	11		0	53.3333	73.3333			1	OE-V	14	15		93.3333	100			1	OE-V	5	2	6	10	5	7	6	5		33.3333	13.3333	40	66.6667	33.3333	46.6667	40	33.3333
10	OE-V	0	9	10		0	60	66.6667			10	OE-V	0	9	10		0	60	66.6667			10	OE-V	15	15		100	100			10	OE-V	11	6	4	12	10	7	5	9		73.3333	40	26.6667	80	66.6667	46.6667	33.3333	60
17	OE-V	0	5	11		0	33.3333	73.3333			17	OE-V	0	5	11		0	33.3333	73.3333			17	OE-V	14	15		93.3333	100			17	OE-V	0	1	0	1	5	2	2	2		0	6.66667	0	6.66667	33.3333	13.3333	13.3333	13.3333
20	OE-V	0	12	6		0	80	40			20	OE-V	0	12	6		0	80	40			20	OE-V	12	14		80	93.3333			20	OE-V	9	10	9	7	11	7	4	7		60	66.6667	60	46.6667	73.3333	46.6667	26.6667	46.6667
21	OE-V	0	7	3		0	46.6667	20			21	OE-V	0	7	3		0	46.6667	20			21	OE-V	12	12		80	80			21	OE-V	7	6	3	9	4	1	2	0		46.6667	40	20	60	26.6667	6.66667	13.3333	0
22	OE-V	0	5	4		0	33.3333	26.6667			22	OE-V	0	5	4		0	33.3333	26.6667			22	OE-V	9	14		60	93.3333			22	OE-V	7	2	4	1	2	1	0	0		46.6667	13.3333	26.6667	6.66667	13.3333	6.66667	0	0
28	OE-V	1	5	5		6.66667	33.3333	33.3333			28	OE-V	1	5	5		6.66667	33.3333	33.3333			28	OE-V	11	12		73.3333	80			28	OE-V	10	12	6	9	4	4	6	2		66.6667	80	40	60	26.6667	26.6667	40	13.3333
33	OE-V	0	9	3		0	60	20			33	OE-V	0	9	3		0	60	20			33	OE-V	11	14		73.3333	93.3333			33	OE-V	7	4	8	6	0	4	6	3		46.6667	26.6667	53.3333	40	0	26.6667	40	20
42	OE-V	0	6	9		0	40	60			42	OE-V	0	6	9		0	40	60			42	OE-V	14	14		93.3333	93.3333			42	OE-V	7	6	15	5	4	6	4	6		46.6667	40	100	33.3333	26.6667	40	26.6667	40
45	OE-V	0	8	6		0	53.3333	40			45	OE-V	0	8	6		0	53.3333	40			45	OE-V	15	15		100	100			45	OE-V	4	12	12	11	13	13	5	0		26.6667	80	80	73.3333	86.6667	86.6667	33.3333	0
48	OE-V	0	11	10		0	73.3333	66.6667			48	OE-V	0	11	10		0	73.3333	66.6667			48	OE-V	14	15		93.3333	100			48	OE-V	1	6	9	6	4	3	1	2		6.66667	40	60	40	26.6667	20	6.66667	13.3333
2	CON-D	0	4	9		0	26.6667	60			2	CON-D	0	4	9		0	26.6667	60												2	CON-D	9	3	5	7	8	10	7	3		60	20	33.3333	46.6667	53.3333	66.6667	46.6667	20
6	CON-D	0	11	11		0	73.3333	73.3333			6	CON-D	0	11	11		0	73.3333	73.3333							OE-D	91.1111	90			6	CON-D	9	13	11	11	15	12	6	4		60	86.6667	73.3333	73.3333	100	80	40	26.6667
8	CON-D	0	8	4		0	53.3333	26.6667			8	CON-D	0	8	4		0	53.3333	26.6667							OE-V	85.4545	93.9394			8	CON-D	6	5	10	5	2	4	3	0		40	33.3333	66.6667	33.3333	13.3333	26.6667	20	0
12	CON-D	0	10	7		0	66.6667	46.6667			12	CON-D	0	10	7		0	66.6667	46.6667												12	CON-D	4	5	3	3	4	4	2	3		26.6667	33.3333	20	20	26.6667	26.6667	13.3333	20
15	CON-D	0	4	5		0	26.6667	33.3333			15	CON-D	0	4	5		0	26.6667	33.3333												15	CON-D	9	9	8	6	2	1	4	2		60	60	53.3333	40	13.3333	6.66667	26.6667	13.3333
16	CON-D	1	11	12		6.66667	73.3333	80			16	CON-D	1	11	12		6.66667	73.3333	80												16	CON-D	9	14	11	11	4	8	9	10		60	93.3333	73.3333	73.3333	26.6667	53.3333	60	66.6667
29	CON-D	0	9	7		0	60	46.6667			29	CON-D	0	9	7		0	60	46.6667												29	CON-D	15	14	15	15	12	11	5	5		100	93.3333	100	100	80	73.3333	33.3333	33.3333
30	CON-D	0	13	11		0	86.6667	73.3333			30	CON-D	0	13	11		0	86.6667	73.3333												30	CON-D	14	14	14	12	9	13	7	8		93.3333	93.3333	93.3333	80	60	86.6667	46.6667	53.3333
32	CON-D	0	5	3		0	33.3333	20			32	CON-D	0	5	3		0	33.3333	20												32	CON-D	8	8	9	1	4	1	0	2		53.3333	53.3333	60	6.66667	26.6667	6.66667	0	13.3333
37	CON-D	0	13	9		0	86.6667	60			37	CON-D	0	13	9		0	86.6667	60												37	CON-D	12	13	14	9	3	0	1	0		80	86.6667	93.3333	60	20	0	6.66667	0
40	CON-D	0	2	10		0	13.3333	66.6667			40	CON-D	0	2	10		0	13.3333	66.6667												40	CON-D	14	6	6	3	2	1	0	1		93.3333	40	40	20	13.3333	6.66667	0	6.66667
43	CON-D	0	7	5		0	46.6667	33.3333			43	CON-D	0	7	5		0	46.6667	33.3333												43	CON-D	10	13	12	14	11	12	8	4		66.6667	86.6667	80	93.3333	73.3333	80	53.3333	26.6667
4	CON-V	2	9	7		13.3333	60	46.6667			4	CON-V	2	9	7		13.3333	60	46.6667												4	CON-V	5	7	7	12	2	13	8	8		33.3333	46.6667	46.6667	80	13.3333	86.6667	53.3333	53.3333
13	CON-V	0	6	4		0	40	26.6667			13	CON-V	0	6	4		0	40	26.6667												13	CON-V	11	11	9	11	8	3	3	1		73.3333	73.3333	60	73.3333	53.3333	20	20	6.66667
23	CON-V	0	4	13		0	26.6667	86.6667			23	CON-V	0	4	13		0	26.6667	86.6667												23	CON-V	7	9	13	12	9	7	4	4		46.6667	60	86.6667	80	60	46.6667	26.6667	26.6667
24	CON-V	0	9	10		0	60	66.6667			24	CON-V	0	9	10		0	60	66.6667												24	CON-V	7	12	13	10	12	10	3	9		46.6667	80	86.6667	66.6667	80	66.6667	20	60
26	CON-V	3	12	8		20	80	53.3333			27	CON-V	0	1	4		0	6.66667	26.6667												26	CON-V	14	13	11	9	8	8	2	4		93.3333	86.6667	73.3333	60	53.3333	53.3333	13.3333	26.6667
27	CON-V	0	1	4		0	6.66667	26.6667			36	CON-V	0	7	10		0	46.6667	66.6667												27	CON-V	12	14	10	8	10	7	3	2		80	93.3333	66.6667	53.3333	66.6667	46.6667	20	13.3333
36	CON-V	0	7	10		0	46.6667	66.6667			41	CON-V	0	8			0	53.3333	0												36	CON-V	11	11	5	8	8	5	2	3		73.3333	73.3333	33.3333	53.3333	53.3333	33.3333	13.3333	20
41	CON-V	0	8			0	53.3333	0			44	CON-V	0	6	14		0	40	93.3333												41	CON-V	13	14	8	11	2	0	1	0		86.6667	93.3333	53.3333	73.3333	13.3333	0	6.66667	0
44	CON-V	0	6	14		0	40	93.3333			46	CON-V	0	12	8		0	80	53.3333												44	CON-V	15	15	15	15	15	14	9	10		100	100	100	100	100	93.3333	60	66.6667
46	CON-V	0	12	8		0	80	53.3333																							46	CON-V	10	10	11	10	8	9	5	3		66.6667	66.6667	73.3333	66.6667	53.3333	60	33.3333	20
																OE-D	0	53.8889	52.7778
					OE-D	0	53.8889	52.7778								OE-V	0.606061	51.5152	47.2727																						OE-D	73.8889	83.8889	74.4444	77.2222	60	48.3333	31.6667	36.6667
					OE-V	0.606061	51.5152	47.2727								CON-D	0.512821	55.3846	52.8205																						OE-V	41.2121	40.6061	46.0606	46.6667	37.5758	33.3333	24.8485	21.8182
					CON-D	0.555556	53.8889	51.6667								CON-V	1.48148	45.9259	51.8519																						CON-D	66.1111	65	65.5556	53.8889	42.2222	42.7778	28.8889	23.3333
					CON-V	3.33333	49.3333	52																																	CON-V	70	77.3333	68	70.6667	54.6667	50.6667	26.6667	29.3333
Flash+											Data excluding outlier
		CS (Day 2,4,6)				CS (Day 2,4,6; %)							CS (Day 2,4,6)				CS (Day 2,4,6; %)
Rat	Group	1	2	3		1	2	3			Rat	Group	1	2	3		1	2	3
3	OE-D	0	11	11		0	73.3333	73.3333			3	OE-D	0	11	11		0	73.3333	73.3333
5	OE-D	0	9	5		0	60	33.3333			5	OE-D	0	9	5		0	60	33.3333
7	OE-D	0	11	13		0	73.3333	86.6667			7	OE-D	0	11	13		0	73.3333	86.6667
11	OE-D	0	15	10		0	100	66.6667			11	OE-D	0	15	10		0	100	66.6667
14	OE-D	0	10	8		0	66.6667	53.3333			14	OE-D	0	10	8		0	66.6667	53.3333
19	OE-D	3	14	14		20	93.3333	93.3333			19	OE-D	3	14	14		20	93.3333	93.3333
25	OE-D	0	15	14		0	100	93.3333			25	OE-D	0	15	14		0	100	93.3333
31	OE-D	0	0	7		0	0	46.6667			31	OE-D	0	0	7		0	0	46.6667
34	OE-D	2	8	9		13.3333	53.3333	60			34	OE-D	2	8	9		13.3333	53.3333	60
38	OE-D	0	8	9		0	53.3333	60			38	OE-D	0	8	9		0	53.3333	60
39	OE-D	0	6	8		0	40	53.3333			39	OE-D	0	6	8		0	40	53.3333
47	OE-D	0	14	15		0	93.3333	100			47	OE-D	0	14	15		0	93.3333	100
1	OE-V	0	6	14		0	40	93.3333			1	OE-V	0	6	14		0	40	93.3333
10	OE-V	0	10	15		0	66.6667	100			10	OE-V	0	10	15		0	66.6667	100
17	OE-V	0	9	15		0	60	100			17	OE-V	0	9	15		0	60	100
20	OE-V	3	10	8		20	66.6667	53.3333			20	OE-V	3	10	8		20	66.6667	53.3333
21	OE-V	0	6	8		0	40	53.3333			21	OE-V	0	6	8		0	40	53.3333
22	OE-V	0	6	8		0	40	53.3333			22	OE-V	0	6	8		0	40	53.3333
28	OE-V	0	6	7		0	40	46.6667			28	OE-V	0	6	7		0	40	46.6667
33	OE-V	0	9	4		0	60	26.6667			33	OE-V	0	9	4		0	60	26.6667
42	OE-V	0	1	13		0	6.66667	86.6667			42	OE-V	0	1	13		0	6.66667	86.6667
45	OE-V	0	3	7		0	20	46.6667			45	OE-V	0	3	7		0	20	46.6667
48	OE-V	0	10	13		0	66.6667	86.6667			48	OE-V	0	10	13		0	66.6667	86.6667
2	CON-D	0	6	8		0	40	53.3333			2	CON-D	0	6	8		0	40	53.3333
6	CON-D	0	6	8		0	40	53.3333			6	CON-D	0	6	8		0	40	53.3333
8	CON-D	0	11	12		0	73.3333	80			8	CON-D	0	11	12		0	73.3333	80
12	CON-D	0	8	7		0	53.3333	46.6667			12	CON-D	0	8	7		0	53.3333	46.6667
15	CON-D	0	4	13		0	26.6667	86.6667			15	CON-D	0	4	13		0	26.6667	86.6667
16	CON-D	0	11	15		0	73.3333	100			16	CON-D	0	11	15		0	73.3333	100
29	CON-D	0	8	11		0	53.3333	73.3333			29	CON-D	0	8	11		0	53.3333	73.3333
30	CON-D	0	14	15		0	93.3333	100			30	CON-D	0	14	15		0	93.3333	100
32	CON-D	0	4	4		0	26.6667	26.6667			32	CON-D	0	4	4		0	26.6667	26.6667
37	CON-D	0	9	8		0	60	53.3333			37	CON-D	0	9	8		0	60	53.3333
40	CON-D	0	10	3		0	66.6667	20			40	CON-D	0	10	3		0	66.6667	20
43	CON-D	0	11	6		0	73.3333	40			43	CON-D	0	11	6		0	73.3333	40
4	CON-V	0	6	9		0	40	60			4	CON-V	0	6	9		0	40	60
13	CON-V	0	7	12		0	46.6667	80			13	CON-V	0	7	12		0	46.6667	80
23	CON-V	0	6	7		0	40	46.6667			23	CON-V	0	6	7		0	40	46.6667
24	CON-V	0	13	12		0	86.6667	80			24	CON-V	0	13	12		0	86.6667	80
26	CON-V	0	7	11		0	46.6667	73.3333			27	CON-V	2	10	9		13.3333	66.6667	60
27	CON-V	2	10	9		13.3333	66.6667	60			36	CON-V	0	5	8		0	33.3333	53.3333
36	CON-V	0	5	8		0	33.3333	53.3333			41	CON-V	0	12	14		0	80	93.3333
41	CON-V	0	12	14		0	80	93.3333			44	CON-V	0	10	15		0	66.6667	100
44	CON-V	0	10	15		0	66.6667	100			46	CON-V	0	0	1		0	0	6.66667
46	CON-V	0	0	1		0	0	6.66667
																OE-D	2.77778	67.2222	68.3333
																OE-V	1.81818	46.0606	67.8788
																CON-D	0	57.4359	63.0769
																CON-V	1.48148	51.1111	64.4444
