# Supplementary material for: Different methods of fear reduction are supported by distinct cortical substrates
Source: eLife. 2020 Jun 26;9:e55294. doi: 10.7554/eLife.55294 (PMC7343386; doi:10.7554/eLife.55294)
Supplement: Figure 4—source data 1. [file elife-55294-fig4-data1.xlsx]

## Sheet: Sheet1
Phase 3: Conditioning																										Phase 4: Extinction
															Data excluding outlier
		CS (trial)					CS (trial; %)								CS (trial)					CS (trial; %)								CS (trial)													CS (trial; %)
Rat	Group	1	2	3	4		1	2	3	4			Rat	Group	1	2	3	4		1	2	3	4			Rat	Group	1	2	3	4	5	6	7	8	9	10	11	12		1	2	3	4	5	6	7	8	9
2	EXT-D	0	1	3	4		0	6.66667	20	26.6667			2	EXT-D	0	1	3	4		0	6.66667	20	26.6667			26	EXT-D	12	15	10	11	14	8	10	5	5	1	5	6		80	100	66.6667	73.3333	93.3333	53.3333	66.6667	33.3333	33.3333
4	EXT-D	3	4	6	5		20	26.6667	40	33.3333			4	EXT-D	3	4	6	5		20	26.6667	40	33.3333			33	EXT-D	0	0	1	0	0	0	0	1	0	1	3	0		0	0	6.66667	0	0	0	0	6.66667	0
10	EXT-D	1	7	14	14		6.66667	46.6667	93.3333	93.3333			10	EXT-D	1	7	14	14		6.66667	46.6667	93.3333	93.3333			34	EXT-D	8	10	10	9	10	3	8	4	3	7	3	2		53.3333	66.6667	66.6667	60	66.6667	20	53.3333	26.6667	20
15	EXT-D	0	5	0	3		0	33.3333	0	20			15	EXT-D	0	5	0	3		0	33.3333	0	20			42	EXT-D	8	3	2	0	2	5	1	1	0	1	0	4		53.3333	20	13.3333	0	13.3333	33.3333	6.66667	6.66667	0
17	EXT-D	0	10	7	15		0	66.6667	46.6667	100			17	EXT-D	0	10	7	15		0	66.6667	46.6667	100			44	EXT-D	4	11	10	11	7	11	4	0	1	0	1	3		26.6667	73.3333	66.6667	73.3333	46.6667	73.3333	26.6667	0	6.66667
26	EXT-D	4	15	14	15		26.6667	100	93.3333	100			33	EXT-D	1	0	0	3		6.66667	0	0	20			46	EXT-D	10	11	6	7	1	3	0	2	1	0	2	1		66.6667	73.3333	40	46.6667	6.66667	20	0	13.3333	6.66667
33	EXT-D	1	0	0	3		6.66667	0	0	20			34	EXT-D	8	4	8	8		53.3333	26.6667	53.3333	53.3333			2	EXT-D	0	2	1	1	0	1	7	5	2	1	1	0		0	13.3333	6.66667	6.66667	0	6.66667	46.6667	33.3333	13.3333
34	EXT-D	8	4	8	8		53.3333	26.6667	53.3333	53.3333			42	EXT-D	0	4	9	4		0	26.6667	60	26.6667			4	EXT-D	6	2	0	1	1	1	1	0	3	10	5	4		40	13.3333	0	6.66667	6.66667	6.66667	6.66667	0	20
42	EXT-D	0	4	9	4		0	26.6667	60	26.6667			44	EXT-D	0	7	10	9		0	46.6667	66.6667	60			10	EXT-D	13	12	9	7	7	3	1	4	1	7	2	3		86.6667	80	60	46.6667	46.6667	20	6.66667	26.6667	6.66667
44	EXT-D	0	7	10	9		0	46.6667	66.6667	60			46	EXT-D	1	6	6	7		6.66667	40	40	46.6667			15	EXT-D	1	4	1	4	1	2	2	2	0	2	5	2		6.66667	26.6667	6.66667	26.6667	6.66667	13.3333	13.3333	13.3333	0
46	EXT-D	1	6	6	7		6.66667	40	40	46.6667			1	EXT-V	0	5	9	3		0	33.3333	60	20			17	EXT-D	6	3	0	4	0	2	0	0	1	0	1	0		40	20	0	26.6667	0	13.3333	0	0	6.66667
1	EXT-V	0	5	9	3		0	33.3333	60	20			6	EXT-V	0	3	3	11		0	20	20	73.3333			31	EXT-V	1	6	5	2	1	1	2	3	5	3	1	0		6.66667	40	33.3333	13.3333	6.66667	6.66667	13.3333	20	33.3333
6	EXT-V	0	3	3	11		0	20	20	73.3333			7	EXT-V	0	4	5	7		0	26.6667	33.3333	46.6667			29	EXT-V	10	11	9	10	3	7	1	1	0	5	5	3		66.6667	73.3333	60	66.6667	20	46.6667	6.66667	6.66667	0
7	EXT-V	0	4	5	7		0	26.6667	33.3333	46.6667			13	EXT-V	3	9	4	4		20	60	26.6667	26.6667			30	EXT-V	8	7	8	1	7	0	2	3	2	4	6	1		53.3333	46.6667	53.3333	6.66667	46.6667	0	13.3333	20	13.3333
13	EXT-V	3	9	4	4		20	60	26.6667	26.6667			20	EXT-V	4	11	9	12		26.6667	73.3333	60	80			37	EXT-V	9	10	3	2	4	2	0	0	0	1	0	1		60	66.6667	20	13.3333	26.6667	13.3333	0	0	0
20	EXT-V	4	11	9	12		26.6667	73.3333	60	80			22	EXT-V	2	5	7	10		13.3333	33.3333	46.6667	66.6667			38	EXT-V	6	5	3	6	7	4	5	0	1	1	0	0		40	33.3333	20	40	46.6667	26.6667	33.3333	0	6.66667
22	EXT-V	2	5	7	10		13.3333	33.3333	46.6667	66.6667			29	EXT-V	2	6	9	14		13.3333	40	60	93.3333			41	EXT-V	8	11	2	2	2	4	4	3	1	4	5	4		53.3333	73.3333	13.3333	13.3333	13.3333	26.6667	26.6667	20	6.66667
29	EXT-V	2	6	9	14		13.3333	40	60	93.3333			30	EXT-V	5	10	6	6		33.3333	66.6667	40	40			1	EXT-V	15	13	12	14	9	4	9	4	8	11	8	3		100	86.6667	80	93.3333	60	26.6667	60	26.6667	53.3333
30	EXT-V	5	10	6	6		33.3333	66.6667	40	40			31	EXT-V	2	4	2	2		13.3333	26.6667	13.3333	13.3333			6	EXT-V	9	3	6	3	2	2	1	1	3	0	2	1		60	20	40	20	13.3333	13.3333	6.66667	6.66667	20
31	EXT-V	2	4	2	2		13.3333	26.6667	13.3333	13.3333			37	EXT-V	0	9	8	2		0	60	53.3333	13.3333			7	EXT-V	5	4	2	2	4	2	0	0	0	0	0	0		33.3333	26.6667	13.3333	13.3333	26.6667	13.3333	0	0	0
37	EXT-V	0	9	8	2		0	60	53.3333	13.3333			38	EXT-V	0	3	7	5		0	20	46.6667	33.3333			13	EXT-V	11	9	13	10	9	8	7	7	5	0	1	2		73.3333	60	86.6667	66.6667	60	53.3333	46.6667	46.6667	33.3333
38	EXT-V	0	3	7	5		0	20	46.6667	33.3333			41	EXT-V	0	3	10	12		0	20	66.6667	80			20	EXT-V	0	3	9	1	4	0	3	0	1	0	0	0		0	20	60	6.66667	26.6667	0	20	0	6.66667
41	EXT-V	0	3	10	12		0	20	66.6667	80			5	CON-D	0	5	3	1		0	33.3333	20	6.66667			22	EXT-V	13	9	14	3	2	4	0	2	3	0	2	4		86.6667	60	93.3333	20	13.3333	26.6667	0	13.3333	20
5	CON-D	0	5	3	1		0	33.3333	20	6.66667			8	CON-D	0	3	4	8		0	20	26.6667	53.3333
8	CON-D	0	3	4	8		0	20	26.6667	53.3333			11	CON-D	1	7	6	12		6.66667	46.6667	40	80																	EXT-D	41.2121	44.2424	30.303	33.3333	26.0606	23.6364	20.6061	14.5455	10.303
11	CON-D	1	7	6	12		6.66667	46.6667	40	80			14	CON-D	2	11	10	13		13.3333	73.3333	66.6667	86.6667																	EXT-V	52.7778	50.5556	47.7778	31.1111	30	21.1111	18.8889	13.3333	16.1111
14	CON-D	2	11	10	13		13.3333	73.3333	66.6667	86.6667			16	CON-D	7	12	11	15		46.6667	80	73.3333	100
16	CON-D	7	12	11	15		46.6667	80	73.3333	100			21	CON-D	1	3	1	4		6.66667	20	6.66667	26.6667			Data excluding outlier
21	CON-D	1	3	1	4		6.66667	20	6.66667	26.6667			32	CON-D	0	0	0	0		0	0	0	0
32	CON-D	0	0	0	0		0	0	0	0			36	CON-D	1	5	7	6		6.66667	33.3333	46.6667	40					CS (trial)													CS (trial; %)
36	CON-D	1	5	7	6		6.66667	33.3333	46.6667	40			39	CON-D	1	8	9	8		6.66667	53.3333	60	53.3333			Rat	Group	1	2	3	4	5	6	7	8	9	10	11	12		1	2	3	4	5	6	7	8	9
39	CON-D	1	8	9	8		6.66667	53.3333	60	53.3333			40	CON-D	0	6	6	10		0	40	40	66.6667			33	EXT-D	0	0	1	0	0	0	0	1	0	1	3	0		0	0	6.66667	0	0	0	0	6.66667	0
40	CON-D	0	6	6	10		0	40	40	66.6667			43	CON-D	0	5	8	3		0	33.3333	53.3333	20			34	EXT-D	8	10	10	9	10	3	8	4	3	7	3	2		53.3333	66.6667	66.6667	60	66.6667	20	53.3333	26.6667	20
43	CON-D	0	5	8	3		0	33.3333	53.3333	20			3	CON-V	0	7	12	13		0	46.6667	80	86.6667			42	EXT-D	8	3	2	0	2	5	1	1	0	1	0	4		53.3333	20	13.3333	0	13.3333	33.3333	6.66667	6.66667	0
3	CON-V	0	7	12	13		0	46.6667	80	86.6667			12	CON-V	0	5	3	5		0	33.3333	20	33.3333			44	EXT-D	4	11	10	11	7	11	4	0	1	0	1	3		26.6667	73.3333	66.6667	73.3333	46.6667	73.3333	26.6667	0	6.66667
12	CON-V	0	5	3	5		0	33.3333	20	33.3333			19	CON-V	0	14	15	11		0	93.3333	100	73.3333			46	EXT-D	10	11	6	7	1	3	0	2	1	0	2	1		66.6667	73.3333	40	46.6667	6.66667	20	0	13.3333	6.66667
19	CON-V	0	14	15	11		0	93.3333	100	73.3333			23	CON-V	5	10	2	3		33.3333	66.6667	13.3333	20			2	EXT-D	0	2	1	1	0	1	7	5	2	1	1	0		0	13.3333	6.66667	6.66667	0	6.66667	46.6667	33.3333	13.3333
23	CON-V	5	10	2	3		33.3333	66.6667	13.3333	20			24	CON-V	0	1	1	6		0	6.66667	6.66667	40			4	EXT-D	6	2	0	1	1	1	1	0	3	10	5	4		40	13.3333	0	6.66667	6.66667	6.66667	6.66667	0	20
24	CON-V	0	1	1	6		0	6.66667	6.66667	40			25	CON-V	1	4	12	6		6.66667	26.6667	80	40			10	EXT-D	13	12	9	7	7	3	1	4	1	7	2	3		86.6667	80	60	46.6667	46.6667	20	6.66667	26.6667	6.66667
25	CON-V	1	4	12	6		6.66667	26.6667	80	40			27	CON-V	0	3	0	5		0	20	0	33.3333			15	EXT-D	1	4	1	4	1	2	2	2	0	2	5	2		6.66667	26.6667	6.66667	26.6667	6.66667	13.3333	13.3333	13.3333	0
27	CON-V	0	3	0	5		0	20	0	33.3333			28	CON-V	3	15	3	11		20	100	20	73.3333			17	EXT-D	6	3	0	4	0	2	0	0	1	0	1	0		40	20	0	26.6667	0	13.3333	0	0	6.66667
28	CON-V	3	15	3	11		20	100	20	73.3333			45	CON-V	0	3	3	3		0	20	20	20			31	EXT-V	1	6	5	2	1	1	2	3	5	3	1	0		6.66667	40	33.3333	13.3333	6.66667	6.66667	13.3333	20	33.3333
45	CON-V	0	3	3	3		0	20	20	20			47	CON-V	1	13	14	9		6.66667	86.6667	93.3333	60			29	EXT-V	10	11	9	10	3	7	1	1	0	5	5	3		66.6667	73.3333	60	66.6667	20	46.6667	6.66667	6.66667	0
47	CON-V	1	13	14	9		6.66667	86.6667	93.3333	60			48	CON-V	1	2	3	5		6.66667	13.3333	20	33.3333			30	EXT-V	8	7	8	1	7	0	2	3	2	4	6	1		53.3333	46.6667	53.3333	6.66667	46.6667	0	13.3333	20	13.3333
48	CON-V	1	2	3	5		6.66667	13.3333	20	33.3333																37	EXT-V	9	10	3	2	4	2	0	0	0	1	0	1		60	66.6667	20	13.3333	26.6667	13.3333	0	0	0
																			EXT-D	9.33333	32	42	48			38	EXT-V	6	5	3	6	7	4	5	0	1	1	0	0		40	33.3333	20	40	46.6667	26.6667	33.3333	0	6.66667
						EXT-D	10.9091	38.1818	46.6667	52.7273									EXT-V	10	40	43.8889	48.8889			41	EXT-V	8	11	2	2	2	4	4	3	1	4	5	4		53.3333	73.3333	13.3333	13.3333	13.3333	26.6667	26.6667	20	6.66667
						EXT-V	10	40	43.8889	48.8889									CON-D	7.87879	39.3939	39.3939	48.4848			1	EXT-V	15	13	12	14	9	4	9	4	8	11	8	3		100	86.6667	80	93.3333	60	26.6667	60	26.6667	53.3333
						CON-D	7.87879	39.3939	39.3939	48.4848									CON-V	6.66667	46.6667	41.2121	46.6667			6	EXT-V	9	3	6	3	2	2	1	1	3	0	2	1		60	20	40	20	13.3333	13.3333	6.66667	6.66667	20
						CON-V	6.66667	46.6667	41.2121	46.6667																7	EXT-V	5	4	2	2	4	2	0	0	0	0	0	0		33.3333	26.6667	13.3333	13.3333	26.6667	13.3333	0	0	0
																										13	EXT-V	11	9	13	10	9	8	7	7	5	0	1	2		73.3333	60	86.6667	66.6667	60	53.3333	46.6667	46.6667	33.3333
																										20	EXT-V	0	3	9	1	4	0	3	0	1	0	0	0		0	20	60	6.66667	26.6667	0	20	0	6.66667
																										22	EXT-V	13	9	14	3	2	4	0	2	3	0	2	4		86.6667	60	93.3333	20	13.3333	26.6667	0	13.3333	20
																																								EXT-D	37.3333	38.6667	26.6667	29.3333	19.3333	20.6667	16	12.6667	8
																																								EXT-V	52.7778	50.5556	47.7778	31.1111	30	21.1111	18.8889	13.3333	16.1111
[truncated: 42 more columns]
