# Supplementary material for: Different methods of fear reduction are supported by distinct cortical substrates
Source: eLife. 2020 Jun 26;9:e55294. doi: 10.7554/eLife.55294 (PMC7343386; doi:10.7554/eLife.55294)
Supplement: Figure 5—source data 1. [file elife-55294-fig5-data1.xlsx]

## Sheet: Sheet1
Phase 1: Conditioning												Phase 2: Extinction																												Test for Extinction
		CS (trial)					CS (trial; %)							CS (trial)													CS (trial; %)															CS (trial)
Rat	Group	1	2	3	4		1	2	3	4		Rat	Group	1	2	3	4	5	6	7	8	9	10	11	12		1	2	3	4	5	6	7	8	9	10	11	12		Rat	Group	1	2	3	4	5	6	7	8
2	EXT-D	0	5	8	10		0	33.3333	53.3333	66.6667		2	EXT-D	10	10	11	3	2	4	3	1	2	1	2	1		66.6667	66.6667	73.3333	20	13.3333	26.6667	20	6.66667	13.3333	6.66667	13.3333	6.66667		2	EXT-D	4	0	0	0	1	1	1	0
4	EXT-D	0	0	6	9		0	0	40	60		4	EXT-D	4	2	2	2	3	2	0	0	0	0	1	0		26.6667	13.3333	13.3333	13.3333	20	13.3333	0	0	0	0	6.66667	0		4	EXT-D	1	1	2	1	2	3	5	3
5	EXT-D	0	8	12	13		0	53.3333	80	86.6667		5	EXT-D	10	14	6	10	8	12	11	5	7	1	6	6		66.6667	93.3333	40	66.6667	53.3333	80	73.3333	33.3333	46.6667	6.66667	40	40		5	EXT-D	9	3	6	3	8	5	5	4
6	EXT-D	0	0	12	7		0	0	80	46.6667		6	EXT-D	7	12	10	9	6	9	9	10	3	0	1	8		46.6667	80	66.6667	60	40	60	60	66.6667	20	0	6.66667	53.3333		6	EXT-D	4	3	2	5	6	5	1	4
7	EXT-D	0	6	15	15		0	40	100	100		7	EXT-D	2	3	2	1	0	4	0	2	0	1	0	1		13.3333	20	13.3333	6.66667	0	26.6667	0	13.3333	0	6.66667	0	6.66667		7	EXT-D	5	7	2	5	3	5	8	5
10	EXT-D	0	8	15	15		0	53.3333	100	100		10	EXT-D	3	15	0	1	1	0	3	0	3	5	0	2		20	100	0	6.66667	6.66667	0	20	0	20	33.3333	0	13.3333		10	EXT-D	2	0	0	2	2	2	1	2
13	EXT-D	0	4	7	10		0	26.6667	46.6667	66.6667		13	EXT-D	0	5	1	2	4	2	1	0	0	1	6	0		0	33.3333	6.66667	13.3333	26.6667	13.3333	6.66667	0	0	6.66667	40	0		13	EXT-D	10	5	3	3	0	5	1	9
14	EXT-D	0	7	9	12		0	46.6667	60	80		14	EXT-D	1	0	6	2	8	12	12	14	7	0	0	0		6.66667	0	40	13.3333	53.3333	80	80	93.3333	46.6667	0	0	0		14	EXT-D	10	8	4	9	4	1	8	6
15	EXT-D	0	6	12	14		0	40	80	93.3333		15	EXT-D	0	0	0	0	0	0	0	1	1	1	2	1		0	0	0	0	0	0	0	6.66667	6.66667	6.66667	13.3333	6.66667		15	EXT-D	1	0	0	0	0	0	0	0
18	EXT-D	0	6	7	14		0	40	46.6667	93.3333		18	EXT-D	3	8	2	1	2	1	4	2	3	0	10	7		20	53.3333	13.3333	6.66667	13.3333	6.66667	26.6667	13.3333	20	0	66.6667	46.6667		18	EXT-D	2	1	2	1	4	0	2	0
20	EXT-D	0	6	12	7		0	40	80	46.6667		20	EXT-D	9	11	10	10	7	9	5	6	6	2	2	3		60	73.3333	66.6667	66.6667	46.6667	60	33.3333	40	40	13.3333	13.3333	20		20	EXT-D	4	1	0	0	5	0	1	0
21	EXT-D	0	4	9	5		0	26.6667	60	33.3333		21	EXT-D	5	7	8	9	8	3	11	8	4	11	9	9		33.3333	46.6667	53.3333	60	53.3333	20	73.3333	53.3333	26.6667	73.3333	60	60		21	EXT-D	2	12	0	0	9	3	1	4
1	EXT-D	0	11	4	5		0	73.3333	26.6667	33.3333		1	EXT-D	9	11	10	6	9	4	7	6	4	6	8	8		60	73.3333	66.6667	40	60	26.6667	46.6667	40	26.6667	40	53.3333	53.3333		1	EXT-D	2	2	4	0	0	2	0	2
4	EXT-D	0	15	13	14		0	100	86.6667	93.3333		4	EXT-D	7	13	14	2	13	3	5	6	7	8	7	4		46.6667	86.6667	93.3333	13.3333	86.6667	20	33.3333	40	46.6667	53.3333	46.6667	26.6667		4	EXT-D	4	1	2	0	1	0	2	0
9	EXT-D	0	12	15	15		0	80	100	100		9	EXT-D	4	7	12	13	12	7	9	11	3	10	7	5		26.6667	46.6667	80	86.6667	80	46.6667	60	73.3333	20	66.6667	46.6667	33.3333		9	EXT-D	9	5	6	6	10	3	0	6
12	EXT-D	0	11	15	15		0	73.3333	100	100		12	EXT-D	0	9	6	1	1	5	0	6	1	1	0	3		0	60	40	6.66667	6.66667	33.3333	0	40	6.66667	6.66667	0	20		12	EXT-D	2	0	12	0	2	0	1	0
1	EXT-VEH	0	9	6	5		0	60	40	33.3333		1	EXT-VEH	0	0	1	7	4	2	6	0	0	8	4	4		0	0	6.66667	46.6667	26.6667	13.3333	40	0	0	53.3333	26.6667	26.6667		1	EXT-VEH	0	3	1	2	2	1	0	0
3	EXT-VEH	0	1	12	9		0	6.66667	80	60		3	EXT-VEH	5	6	3	3	4	2	9	6	3	6	1	4		33.3333	40	20	20	26.6667	13.3333	60	40	20	40	6.66667	26.6667		3	EXT-VEH	0	2	2	0	1	0	1	0
8	EXT-VEH	0	0	15	11		0	0	100	73.3333		8	EXT-VEH	2	8	4	1	0	0	0	0	0	0	0	2		13.3333	53.3333	26.6667	6.66667	0	0	0	0	0	0	0	13.3333		8	EXT-VEH	2	3	1	3	2	3	2	0
9	EXT-VEH	0	5	6	14		0	33.3333	40	93.3333		9	EXT-VEH	2	9	0	1	4	0	0	1	0	1	0	0		13.3333	60	0	6.66667	26.6667	0	0	6.66667	0	6.66667	0	0		9	EXT-VEH	5	3	2	1	0	2	1	0
11	EXT-VEH	0	13	11	15		0	86.6667	73.3333	100		11	EXT-VEH	1	2	2	1	2	0	3	1	4	0	2	2		6.66667	13.3333	13.3333	6.66667	13.3333	0	20	6.66667	26.6667	0	13.3333	13.3333		11	EXT-VEH	2	1	1	0	2	3	3	0
12	EXT-VEH	0	0	7	13		0	0	46.6667	86.6667		12	EXT-VEH	1	5	5	2	0	0	2	1	5	1	0	0		6.66667	33.3333	33.3333	13.3333	0	0	13.3333	6.66667	33.3333	6.66667	0	0		12	EXT-VEH	1	2	2	3	0	1	0	1
16	EXT-VEH	0	2	15	15		0	13.3333	100	100		16	EXT-VEH	1	2	3	0	6	3	5	0	1	9	1	1		6.66667	13.3333	20	0	40	20	33.3333	0	6.66667	60	6.66667	6.66667		16	EXT-VEH	5	5	2	2	0	1	4	2
17	EXT-VEH	0	9	15	10		0	60	100	66.6667		17	EXT-VEH	1	0	1	4	1	0	0	1	0	0	0	1		6.66667	0	6.66667	26.6667	6.66667	0	0	6.66667	0	0	0	6.66667		17	EXT-VEH	3	1	1	0	2	2	3	0
19	EXT-VEH	0	2	5	9		0	13.3333	33.3333	60		19	EXT-VEH	9	10	11	9	6	4	7	10	1	2	4	1		60	66.6667	73.3333	60	40	26.6667	46.6667	66.6667	6.66667	13.3333	26.6667	6.66667		19	EXT-VEH	1	0	1	0	0	1	3	2
22	EXT-VEH	0	4	5	4		0	26.6667	33.3333	26.6667		22	EXT-VEH	1	9	11	3	6	6	5	7	2	5	7	4		6.66667	60	73.3333	20	40	40	33.3333	46.6667	13.3333	33.3333	46.6667	26.6667		22	EXT-VEH	0	0	0	0	0	0	2	0
23	EXT-VEH	0	5	15	8		0	33.3333	100	53.3333		23	EXT-VEH	14	14	14	10	7	8	4	9	6	5	5	6		93.3333	93.3333	93.3333	66.6667	46.6667	53.3333	26.6667	60	40	33.3333	33.3333	40		23	EXT-VEH	0	0	0	0	0	0	4	0
24	EXT-VEH	0	7	13	14		0	46.6667	86.6667	93.3333		24	EXT-VEH	7	12	9	8	2	4	3	4	5	7	6	3		46.6667	80	60	53.3333	13.3333	26.6667	20	26.6667	33.3333	46.6667	40	20		24	EXT-VEH	0	0	0	0	1	3	4	0
2	EXT-VEH	1	11	13	14		6.66667	73.3333	86.6667	93.3333		2	EXT-VEH	9	11	12	11	10	8	10	4	9	3	9	7		60	73.3333	80	73.3333	66.6667	53.3333	66.6667	26.6667	60	20	60	46.6667		2	EXT-VEH	1	0	1	0	2	2	8	2
3	EXT-VEH	0	13	13	12		0	86.6667	86.6667	80		3	EXT-VEH	10	10	8	9	8	7	10	4	7	3	5	4		66.6667	66.6667	53.3333	60	53.3333	46.6667	66.6667	26.6667	46.6667	20	33.3333	26.6667		3	EXT-VEH	3	6	1	2	2	1	1	0
10	EXT-VEH	0	14	15	15		0	93.3333	100	100		10	EXT-VEH	12	1	8	5	10	8	10	1	5	1	0	0		80	6.66667	53.3333	33.3333	66.6667	53.3333	66.6667	6.66667	33.3333	6.66667	0	0		10	EXT-VEH	0	2	0	0	0	0	0	0
11	EXT-VEH	0	8	15	15		0	53.3333	100	100		11	EXT-VEH	13	11	11	10	1	11	12	1	0	1	8	1		86.6667	73.3333	73.3333	66.6667	6.66667	73.3333	80	6.66667	0	6.66667	53.3333	6.66667		11	EXT-VEH	2	2	0	9	0	0	4	0
5	CON-D	3	12	8	7		20	80	53.3333	46.6667																														5	CON-D	10	14	11	11	12	5	10	13
7	CON-D	0	13	15	15		0	86.6667	100	100																EXT-D	30.8333	52.9167	41.6667	30	35	32.0833	33.3333	32.5	21.25	20	25.4167	24.1667		7	CON-D	11	14	14	12	12	12	8	11
14	CON-D	0	14	15	15		0	93.3333	100	100																EXT-V	36.6667	45.8333	42.9167	35	29.5833	26.25	35.8333	20.8333	20	21.6667	21.6667	16.6667		14	CON-D	1	2	3	2	1	0	0	0
16	CON-D	0	10	15	15		0	66.6667	100	100																														16	CON-D	9	9	7	1	4	3	2	3
17	CON-D	0	6	15	15		0	40	100	100																														17	CON-D	8	6	7	5	3	4	0	4
19	CON-D	0	6	10	14		0	40	66.6667	93.3333																														19	CON-D	8	13	9	5	5	2	4	7
23	CON-D	0	12	15	15		0	80	100	100																														23	CON-D	14	10	10	6	8	8	2	1
26	CON-D	0	0	5	0		0	0	33.3333	0																														26	CON-D	10	11	9	2	1	3	5	0
29	CON-D	0	4	15	14		0	26.6667	100	93.3333																														29	CON-D	14	15	13	9	11	13	7	6
31	CON-D	0	9	11	9		0	60	73.3333	60																														31	CON-D	6	3	10	6	7	2	7	2
32	CON-D	0	9	15	13		0	60	100	86.6667																														32	CON-D	12	14	15	15	15	14	12	7
6	CON-VEH	0	8	11	15		0	53.3333	73.3333	100																														6	CON-VEH	11	12	10	6	6	0	7	6
8	CON-VEH	0	10	14	14		0	66.6667	93.3333	93.3333																														8	CON-VEH	9	13	12	8	9	1	7	6
13	CON-VEH	0	9	15	15		0	60	100	100																														13	CON-VEH	6	11	10	12	7	6	10	10
15	CON-VEH	0	15	15	15		0	100	100	100																														15	CON-VEH	8	6	12	6	1	3	5	4
18	CON-VEH	0	4	11	14		0	26.6667	73.3333	93.3333																														18	CON-VEH	9	13	12	13	7	8	11	5
20	CON-VEH	0	13	12	15		0	86.6667	80	100																														20	CON-VEH	5	7	9	5	5	1	7	1
21	CON-VEH	0	6	15	14		0	40	100	93.3333																														21	CON-VEH	6	12	9	3	3	3	3	7
24	CON-VEH	0	2	13	10		0	13.3333	86.6667	66.6667																														24	CON-VEH	8	7	2	3	4	4	5	4
25	CON-VEH	0	3	10	10		0	20	66.6667	66.6667																														25	CON-VEH	4	5	2	4	4	1	2	3
27	CON-VEH	6	5	11	9		40	33.3333	73.3333	60																														27	CON-VEH	10	8	8	4	4	1	9	9
28	CON-VEH	0	2	5	10		0	13.3333	33.3333	66.6667																														28	CON-VEH	3	4	2	2	3	2	3	5
30	CON-VEH	0	12	14	13		0	80	93.3333	86.6667																														30	CON-VEH	15	11	6	10	8	8	6	10
[truncated: 28 more columns]
