# Supplementary material for: Different methods of fear reduction are supported by distinct cortical substrates
Source: eLife. 2020 Jun 26;9:e55294. doi: 10.7554/eLife.55294 (PMC7343386; doi:10.7554/eLife.55294)
Supplement: Figure 6—source data 1. [file elife-55294-fig6-data1.xlsx]

## Sheet: Sheet1
Phase 3: Conditioning												Phase 4: Extinction																												Test for Re-Extinction
		CS (trial)					CS (trial; %)							CS (trial)													CS (trial; %)															CS (trial)
Rat	Group	1	2	3	4		1	2	3	4		Rat	Group	1	2	3	4	5	6	7	8	9	10	11	12		1	2	3	4	5	6	7	8	9	10	11	12		Rat	Group	1	2	3	4	5	6	7	8
1	EXT-D	0	13	15	15		0	86.6667	100	100		1	EXT-D	6	2	1	14	1	10	10	12	4	7	3	3		40	13.3333	6.66667	93.3333	6.66667	66.6667	66.6667	80	26.6667	46.6667	20	20		1	EXT-D	12	12	10	6	11	8	5	0
4	EXT-D	0	4	13	9		0	26.6667	86.6667	60		4	EXT-D	3	3	0	11	10	4	1	2	7	10	2	0		20	20	0	73.3333	66.6667	26.6667	6.66667	13.3333	46.6667	66.6667	13.3333	0		4	EXT-D	9	13	3	1	5	0	1	4
6	EXT-D	0	10	14	15		0	66.6667	93.3333	100		6	EXT-D	4	10	4	13	5	8	8	0	13	9	0	1		26.6667	66.6667	26.6667	86.6667	33.3333	53.3333	53.3333	0	86.6667	60	0	6.66667		6	EXT-D	14	15	11	6	7	2	6	3
8	EXT-D	0	13	12	11		0	86.6667	80	73.3333		8	EXT-D	13	13	13	13	12	12	12	14	9	8	7	11		86.6667	86.6667	86.6667	86.6667	80	80	80	93.3333	60	53.3333	46.6667	73.3333		8	EXT-D	5	4	3	6	5	6	2	1
10	EXT-D	0	15	15	15		0	100	100	100		10	EXT-D	13	15	15	15	14	1	14	13	11	11	9	7		86.6667	100	100	100	93.3333	6.66667	93.3333	86.6667	73.3333	73.3333	60	46.6667		10	EXT-D	13	12	8	2	6	6	5	3
12	EXT-D	2	11	11	13		13.3333	73.3333	73.3333	86.6667		12	EXT-D	10	14	11	12	11	7	14	5	11	7	11	9		66.6667	93.3333	73.3333	80	73.3333	46.6667	93.3333	33.3333	73.3333	46.6667	73.3333	60		12	EXT-D	8	4	5	1	2	1	5	3
13	EXT-D	0	12	15	13		0	80	100	86.6667		13	EXT-D	14	15	8	7	13	6	11	7	4	8	7	6		93.3333	100	53.3333	46.6667	86.6667	40	73.3333	46.6667	26.6667	53.3333	46.6667	40		13	EXT-D	8	11	7	9	4	3	8	2
16	EXT-D	0	14	15	15		0	93.3333	100	100		16	EXT-D	8	15	14	13	12	7	13	11	12	10	1	8		53.3333	100	93.3333	86.6667	80	46.6667	86.6667	73.3333	80	66.6667	6.66667	53.3333		16	EXT-D	13	9	7	9	1	11	2	6
18	EXT-D	2	13	11	8		13.3333	86.6667	73.3333	53.3333		18	EXT-D	10	15	12	12	13	8	13	9	7	14	14	6		66.6667	100	80	80	86.6667	53.3333	86.6667	60	46.6667	93.3333	93.3333	40		18	EXT-D	13	9	4	12	10	11	9	11
21	EXT-D	0	13	12	13		0	86.6667	80	86.6667		21	EXT-D	14	11	12	14	12	8	12	10	9	6	2	6		93.3333	73.3333	80	93.3333	80	53.3333	80	66.6667	60	40	13.3333	40		21	EXT-D	4	4	9	6	5	6	2	5
22	EXT-D	1	1	5	5		6.66667	6.66667	33.3333	33.3333		22	EXT-D	11	11	8	4	13	9	8	4	9	9	7	2		73.3333	73.3333	53.3333	26.6667	86.6667	60	53.3333	26.6667	60	60	46.6667	13.3333		22	EXT-D	4	3	2	6	3	3	1	2
24	EXT-D	5	8	14	15		33.3333	53.3333	93.3333	100		24	EXT-D	12	14	15	8	12	13	12	5	12	11	6	11		80	93.3333	100	53.3333	80	86.6667	80	33.3333	80	73.3333	40	73.3333		24	EXT-D	15	13	8	6	7	4	7	7
1	EXT-D	0	6	12	10		0	40	80	66.6667		1	EXT-D	14	13	11	10	13	12	10	13	7	14	9	6		93.3333	86.6667	73.3333	66.6667	86.6667	80	66.6667	86.6667	46.6667	93.3333	60	40		1	EXT-D	13	9	5	4	2	3	2	1
3	EXT-D	5	13	15	6		33.3333	86.6667	100	40		3	EXT-D	3	12	10	8	13	9	10	13	11	11	11	10		20	80	66.6667	53.3333	86.6667	60	66.6667	86.6667	73.3333	73.3333	73.3333	66.6667		3	EXT-D	9	5	4	3	0	2	3	0
10	EXT-D	3	10	15	12		20	66.6667	100	80		10	EXT-D	12	8	4	11	6	9	10	10	12	0	0	0		80	53.3333	26.6667	73.3333	40	60	66.6667	66.6667	80	0	0	0		10	EXT-D	10	10	2	9	1	2	3	12
12	EXT-D	0	15	15	14		0	100	100	93.3333		12	EXT-D	12	13	11	12	10	11	6	8	8	8	6	7		80	86.6667	73.3333	80	66.6667	73.3333	40	53.3333	53.3333	53.3333	40	46.6667		12	EXT-D	6	5	7	6	6	6	1	5
2	EXT-VEH	1	13	14	15		6.66667	86.6667	93.3333	100		2	EXT-VEH	14	15	15	14	14	11	14	10	9	14	6	6		93.3333	100	100	93.3333	93.3333	73.3333	93.3333	66.6667	60	93.3333	40	40		2	EXT-VEH	12	12	11	3	7	1	8	0
3	EXT-VEH	0	2	14	8		0	13.3333	93.3333	53.3333		3	EXT-VEH	12	8	5	5	5	11	5	8	3	7	1	6		80	53.3333	33.3333	33.3333	33.3333	73.3333	33.3333	53.3333	20	46.6667	6.66667	40		3	EXT-VEH	9	4	1	0	0	6	1	3
5	EXT-VEH	0	15	14	15		0	100	93.3333	100		5	EXT-VEH	14	11	12	8	12	9	11	4	8	4	5	3		93.3333	73.3333	80	53.3333	80	60	73.3333	26.6667	53.3333	26.6667	33.3333	20		5	EXT-VEH	8	10	4	3	4	3	3	4
7	EXT-VEH	1	13	9	15		6.66667	86.6667	60	100		7	EXT-VEH	11	12	10	8	12	8	5	8	2	11	6	4		73.3333	80	66.6667	53.3333	80	53.3333	33.3333	53.3333	13.3333	73.3333	40	26.6667		7	EXT-VEH	8	7	3	2	4	3	5	3
9	EXT-VEH	3	4	14	15		20	26.6667	93.3333	100		9	EXT-VEH	15	15	8	13	11	12	8	13	9	6	10	5		100	100	53.3333	86.6667	73.3333	80	53.3333	86.6667	60	40	66.6667	33.3333		9	EXT-VEH	10	6	5	6	4	1	6	3
11	EXT-VEH	1	13	14	14		6.66667	86.6667	93.3333	93.3333		11	EXT-VEH	12	15	15	14	15	13	9	11	10	10	6	10		80	100	100	93.3333	100	86.6667	60	73.3333	66.6667	66.6667	40	66.6667		11	EXT-VEH	8	13	4	1	3	1	1	0
14	EXT-VEH	0	15	13	12		0	100	86.6667	80		14	EXT-VEH	14	14	15	15	15	5	11	8	6	0	6	0		93.3333	93.3333	100	100	100	33.3333	73.3333	53.3333	40	0	40	0		14	EXT-VEH	10	12	10	3	2	3	3	1
15	EXT-VEH	0	14	15	15		0	93.3333	100	100		15	EXT-VEH	12	5	8	4	9	9	0	4	7	3	4	5		80	33.3333	53.3333	26.6667	60	60	0	26.6667	46.6667	20	26.6667	33.3333		15	EXT-VEH	10	6	10	5	7	3	4	6
17	EXT-VEH	0	13	12	14		0	86.6667	80	93.3333		17	EXT-VEH	6	12	10	1	1	15	5	15	9	3	15	0		40	80	66.6667	6.66667	6.66667	100	33.3333	100	60	20	100	0		17	EXT-VEH	13	10	11	9	13	4	4	3
19	EXT-VEH	1	2	15	15		6.66667	13.3333	100	100		19	EXT-VEH	14	15	15	13	15	14	12	10	7	3	7	0		93.3333	100	100	86.6667	100	93.3333	80	66.6667	46.6667	20	46.6667	0		19	EXT-VEH	1	6	0	0	2	0	0	3
20	EXT-VEH	2	2	11	9		13.3333	13.3333	73.3333	60		20	EXT-VEH	13	14	13	9	8	8	10	10	12	8	10	10		86.6667	93.3333	86.6667	60	53.3333	53.3333	66.6667	66.6667	80	53.3333	66.6667	66.6667		20	EXT-VEH	5	7	6	12	10	4	11	4
23	EXT-VEH	2	15	15	15		13.3333	100	100	100		23	EXT-VEH	15	15	14	10	14	15	14	12	8	15	15	14		100	100	93.3333	66.6667	93.3333	100	93.3333	80	53.3333	100	100	93.3333		23	EXT-VEH	10	15	15	14	2	4	9	8
2	EXT-VEH	0	10	12	13		0	66.6667	80	86.6667		2	EXT-VEH	13	15	15	15	15	15	14	15	13	15	8	15		86.6667	100	100	100	100	100	93.3333	100	86.6667	100	53.3333	100		2	EXT-VEH	15	15	15	13	11	14	6	4
4	EXT-VEH	9	14	9	10		60	93.3333	60	66.6667		4	EXT-VEH	10	13	12	12	12	12	7	15	10	10	1	8		66.6667	86.6667	80	80	80	80	46.6667	100	66.6667	66.6667	6.66667	53.3333		4	EXT-VEH	14	14	13	6	9	10	10	7
9	EXT-VEH	1	12	12	5		6.66667	80	80	33.3333		9	EXT-VEH	6	14	14	9	3	8	8	12	3	11	8	11		40	93.3333	93.3333	60	20	53.3333	53.3333	80	20	73.3333	53.3333	73.3333		9	EXT-VEH	3	10	2	3	4	0	9	4
11	EXT-VEH	8	15	15	15		53.3333	100	100	100		11	EXT-VEH	12	14	10	14	13	14	15	9	13	11	11	7		80	93.3333	66.6667	93.3333	86.6667	93.3333	100	60	86.6667	73.3333	73.3333	46.6667		11	EXT-VEH	1	4	4	1	3	2	2	7
5	CON-D	0	7	14	12		0	46.6667	93.3333	80																														5	CON-D	10	12	13	12	14	11	9	10
6	CON-D	1	15	15	15		6.66667	100	100	100																EXT-D	66.25	76.6667	62.0833	73.75	70.8333	55.8333	68.3333	56.6667	60.8333	59.5833	39.5833	38.75		6	CON-D	14	15	15	15	11	14	12	11
15	CON-D	0	15	15	15		0	100	100	100																EXT-V	80.4167	86.25	79.5833	68.3333	72.5	74.5833	61.6667	68.3333	53.75	54.5833	49.5833	43.3333		15	CON-D	14	15	15	14	6	6	5	6
16	CON-D	0	10	14	13		0	66.6667	93.3333	86.6667																														16	CON-D	12	10	5	10	9	4	8	4
19	CON-D	3	10	14	14		20	66.6667	93.3333	93.3333																														19	CON-D	13	10	11	10	12	3	3	4
20	CON-D	2	14	15	12		13.3333	93.3333	100	80																														20	CON-D	12	9	8	8	5	8	10	12
21	CON-D	0	13	13	10		0	86.6667	86.6667	66.6667																														21	CON-D	13	14	6	8	8	11	4	7
23	CON-D	14	15	15	15		93.3333	100	100	100																														23	CON-D	14	15	13	14	13	11	13	9
25	CON-D	5	15	15	15		33.3333	100	100	100																														25	CON-D	13	15	14	15	12	12	9	8
26	CON-D	0	1	7	6		0	6.66667	46.6667	40																														26	CON-D	6	6	4	4	1	2	4	2
27	CON-D	2	11	11	10		13.3333	73.3333	73.3333	66.6667																														27	CON-D	2	4	6	7	7	4	6	4
32	CON-D	10	15	15	15		66.6667	100	100	100																														32	CON-D	14	14	15	15	8	6	10	9
7	CON-VEH	0	15	15	15		0	100	100	100																														7	CON-VEH	15	15	15	15	15	11	15	15
8	CON-VEH	0	15	13	5		0	100	86.6667	33.3333																														8	CON-VEH	10	15	10	10	10	9	2	8
13	CON-VEH	0	13	15	14		0	86.6667	100	93.3333																														13	CON-VEH	13	12	13	13	13	11	12	11
14	CON-VEH	3	14	15	15		20	93.3333	100	100																														14	CON-VEH	11	14	12	9	14	12	10	3
17	CON-VEH	6	15	15	15		40	100	100	100																														17	CON-VEH	15	15	10	11	12	7	10	10
18	CON-VEH	0	12	13	14		0	80	86.6667	93.3333																														18	CON-VEH	11	12	7	7	4	3	7	2
24	CON-VEH	9	15	15	7		60	100	100	46.6667																														24	CON-VEH	7	5	7	3	7	10	8	12
28	CON-VEH	6	15	15	15		40	100	100	100																														28	CON-VEH	14	15	14	14	13	5	15	14
29	CON-VEH	0	12	15	15		0	80	100	100																														29	CON-VEH	12	12	8	9	9	4	6	6
30	CON-VEH	0	3	15	15		0	20	100	100																														30	CON-VEH	12	7	5	4	3	4	0	1
31	CON-VEH	0	14	14	12		0	93.3333	93.3333	80																														31	CON-VEH	13	5	9	10	6	8	7	4
[truncated: 28 more columns]
